# Supplementary material
Source: publisher figshare collection journal article supplement (https://acs.figshare.com/ndownloader/files/3773836)
Supplement: Supplementary file 1 [file 3773836]

data_publication_text
_publ_requested_journal          J.Am.Chem.Soc.
_publ_contact_author_name        'Phil S. Baran'
_publ_contact_author_address     
;The Scripps Research Institute
10550 North Torrey Pines Road
Room BCC-436
La Jolla, CA, USA, 92037
;
_publ_contact_author_email       pbaran@scripps.edu
_publ_contact_author_phone       858-784-7373
_publ_contact_author_fax         858-784-7375
loop_
_publ_author_name
_publ_author_address
'Baran, Phil S.'
;The Scripps Research Institute
10550 North Torrey Pines Road
Room BCC-436
La Jolla, CA, USA, 92037
;


#######################################################################
#
#                 Cambridge Crystallographic Data Centre
#                                CCDC 
#
#######################################################################
#
# If this CIF has been generated directly or indirectly from an entry in the 
# Cambridge Structural Database, then it will include bibliographic, chemical, 
# crystal, experimental, refinement or atomic coordinate data resulting from 
# the CCDC's data processing and validation procedures. Files generated from 
# CSD entries are Copyright 2014 Cambridge Crystallographic Data Centre. They 
# may be used in bona fide research applications only, and may not be copied or 
# further disseminated in any form, whether machine-readable or not, except for 
# the purposes of generating routine backup copies on your local computer 
# system.
# 
# Files arising from any other source may also contain material that is the 
# copyright of third parties, including the originator, and you should check 
# with the originator concerning the permitted uses of the information 
# contained in this CIF.
#
# For further information on the CCDC and the free tools enCIFer and Mercury
# for validating and visualising CIF files, please visit www.ccdc.cam.ac.uk
#
#######################################################################

data_baran408
_symmetry_cell_setting           triclinic
_symmetry_space_group_name_H-M   'P 1'
_symmetry_Int_Tables_number      1
loop_
_symmetry_equiv_pos_site_id
_symmetry_equiv_pos_as_xyz
1 x,y,z
_cell_length_a                   8.4202(3)
_cell_length_b                   12.4810(5)
_cell_length_c                   12.5295(5)
_cell_angle_alpha                114.658(2)
_cell_angle_beta                 100.995(2)
_cell_angle_gamma                97.354(2)
_cell_volume                     1142.48
loop_
_atom_site_label
_atom_site_type_symbol
_atom_site_fract_x
_atom_site_fract_y
_atom_site_fract_z
O1' O 1.01338(17) 1.12029(14) 0.90234(14)
O2' O 0.94944(18) 1.00673(15) 0.99324(14)
O3' O 1.4712(2) 1.1211(2) 0.81923(17)
O4' O 1.57984(19) 1.29709(14) 1.27240(14)
O5' O 1.68387(16) 1.21381(13) 1.21895(13)
N1' N 1.50043(19) 1.03285(15) 1.18094(15)
N2' N 1.29685(19) 1.02644(15) 0.88360(15)
C1' C 0.9148(3) 1.2003(2) 0.9645(3)
H1'A H 0.9317 1.2732 0.9524
H1'B H 0.9493 1.2233 1.0519
H1'C H 0.7969 1.1584 0.9312
C2' C 1.0225(2) 1.02810(19) 0.92884(18)
C3' C 1.1346(2) 0.95183(18) 0.86420(18)
H3' H 1.0786 0.9116 0.7747
C4' C 1.1567(2) 0.85206(18) 0.90182(19)
H4'A H 1.0501 0.8170 0.9100
H4'B H 1.1901 0.7866 0.8384
C5' C 1.2864(2) 0.90300(17) 1.02007(18)
C6' C 1.3134(2) 0.85446(18) 1.10547(19)
C7' C 1.2329(3) 0.75012(19) 1.1072(2)
H7' H 1.1409 0.6944 1.0415
C8' C 1.2898(3) 0.7299(2) 1.2061(2)
H8' H 1.2361 0.6598 1.2089
C9' C 1.4254(3) 0.8112(3) 1.3023(2)
H9' H 1.4626 0.7947 1.3691
C10' C 1.5075(3) 0.9151(2) 1.3034(2)
H10' H 1.6004 0.9695 1.3691
C11' C 1.4483(2) 0.93686(19) 1.20370(19)
C12' C 1.4013(2) 1.00956(16) 1.06786(17)
C13' C 1.4094(2) 1.09361(18) 1.01015(17)
H13' H 1.5257 1.1134 1.0050
C14' C 1.3429(3) 1.0487(2) 0.7960(2)
C15' C 1.2337(4) 0.9773(3) 0.6667(2)
H15D H 1.2923 0.9894 0.6107
H15E H 1.1304 1.0052 0.6597
H15F H 1.2077 0.8910 0.6460
C16' C 1.3600(2) 1.21399(18) 1.08118(19)
H16C H 1.3029 1.2379 1.0208
H16D H 1.2776 1.1972 1.1223
C17' C 1.4963(3) 1.3221(2) 1.1761(2)
C18' C 1.6196(3) 1.3670(2) 1.1217(3)
H18D H 1.6602 1.2989 1.0697
H18E H 1.7135 1.4284 1.1874
H18F H 1.5649 1.4027 1.0727
C19' C 1.4182(4) 1.4244(2) 1.2479(3)
H19D H 1.5064 1.4941 1.3096
H19E H 1.3459 1.3959 1.2880
H19F H 1.3524 1.4485 1.1919
C20' C 1.6607(2) 1.12073(19) 1.25377(19)
H20' H 1.6666 1.1557 1.3426
C21' C 1.8046(2) 1.06321(19) 1.22975(19)
H21' H 1.8009 1.0160 1.1467
C22' C 1.9357(3) 1.0714(2) 1.3121(2)
C23' C 2.0746(3) 1.0131(3) 1.2741(3)
H23D H 2.0448 0.9672 1.1850
H23E H 2.0928 0.9583 1.3105
H23F H 2.1767 1.0760 1.3021
C24' C 1.9595(4) 1.1337(4) 1.4461(3)
H24D H 1.8568 1.1568 1.4631
H24E H 2.0504 1.2064 1.4828
H24F H 1.9871 1.0788 1.4807

#END
